# Supplementary material for: Site-2 Protease Slr1821 Regulates Carbon/Nitrogen Homeostasis during Ammonium Stress Acclimation in Cyanobacterium Synechocystis sp. PCC 6803
Source: MDPI journal article supplement (doi:10.3390/ijms24076606), 2023-04-01
Supplement: s1 [file s1]

**Supplemental Table S1. Statistics result of RNA sequencing data.**

| Sample_<br>ID | Raw Data<br>Total_Reads | Raw Data<br>Total_Bases | Clean Data<br>Total_Reads | Clean Data<br>Total_Bases | Error% | Q20%  | Q30%  | GC%   |
|---------------|-------------------------|-------------------------|---------------------------|---------------------------|--------|-------|-------|-------|
| M-1           | 19019678                | 2.87E+09                | 18885526                  | 2.73E+09                  | 0.0109 | 98.78 | 96.62 | 49.23 |
| M-2           | 20045072                | 3.03E+09                | 19596762                  | 2.81E+09                  | 0.0119 | 98.43 | 95.42 | 49.15 |
| M-3           | 20440760                | 3.09E+09                | 20012366                  | 2.86E+09                  | 0.0118 | 98.48 | 95.55 | 49.49 |
| MA-1          | 24578712                | 3.71E+09                | 24028760                  | 3.45E+09                  | 0.0119 | 98.41 | 95.38 | 49.12 |
| MA-2          | 22051244                | 3.33E+09                | 21507562                  | 3.08E+09                  | 0.0122 | 98.3  | 95.11 | 49.01 |
| MA-3          | 23445508                | 3.54E+09                | 22897854                  | 3.28E+09                  | 0.012  | 98.37 | 95.29 | 49.35 |
| WT-1          | 15365482                | 2.32E+09                | 15167632                  | 2.13E+09                  | 0.0106 | 99.05 | 96.98 | 52.42 |
| WT-2          | 20409760                | 3.08E+09                | 20153882                  | 2.85E+09                  | 0.0106 | 99.06 | 97    | 51.36 |
| WT-3          | 19982788                | 3.02E+09                | 19445352                  | 2.78E+09                  | 0.0124 | 98.22 | 94.86 | 51    |
| WTA-1         | 24030246                | 3.63E+09                | 23478232                  | 3.37E+09                  | 0.0121 | 98.36 | 95.23 | 50.85 |
| WTA-2         | 24443248                | 3.69E+09                | 23900728                  | 3.43E+09                  | 0.012  | 98.4  | 95.31 | 51.26 |
| WTA-3         | 24981840                | 3.77E+09                | 24438662                  | 3.51E+09                  | 0.0119 | 98.42 | 95.37 | 50.78 |

**Supplemental Table S10. Sequences of primers using in RT-qPCR.**

| Name      | Sequences of primers |
|-----------|----------------------|
| mpB-S     | GAGTTAGGGAGGGAGTTGC  |
| mpB-A     | GTGCAGGATGACGGAGAAA  |
| sll1017-S | TGCTGCGGACAGAGTGGT   |
| sll1017-A | GTGGGCTGGTATGGCTTT   |
| slr1201-S | AAGTCACCGTCCTGGCTCT  |
| slr1201-A | CCCTGGTTTCATCGTCCC   |
| slr0901-S | TTATTTCTGCCCAAGAGT   |
| slr0901-A | ACCGATTATGCCTCCACA   |
| sll0783-S | TAACACCGGGACCATAGA   |
| sll0783-A | TACAGTGGCGTTTGAAGG   |
| sll1327-S | GAGCCACTAGGGAATCGG   |
| sll1327-A | GGCAGTAAAGCCAAGCAAT  |
| slr1291-S | ACCTACGACCGTACCCAC   |
| slr1291-A | AAAGAAGCCATAGCACCC   |
| slr0851-S | CGGTGTTGACTGAAAGAATG |
| slr0851-A | GAGGCTAGAAGCCCTGAC   |
| slr0952-S | ATATCCGCATTCCCAACC   |
| slr0952-A | CGGGCAGTGTAACCTTCG   |
| sll1590-S | GTGTCATTGCGGTAAACATC |
| sll1590-A | CCCTTAATGCCTTCCAAGC  |
| slr1728-S | AGAAGTGCGCTTTGGTTG   |
| slr1728-A | GGAATAGGTCCGATAGGGT  |

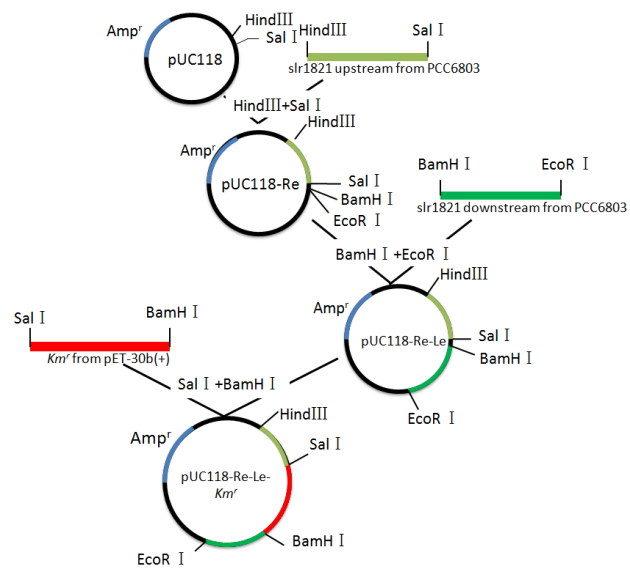

**Supplemental Figure S1. Construction of the plasmid for homologous recombination to knockout *slr1821* gene.**

A

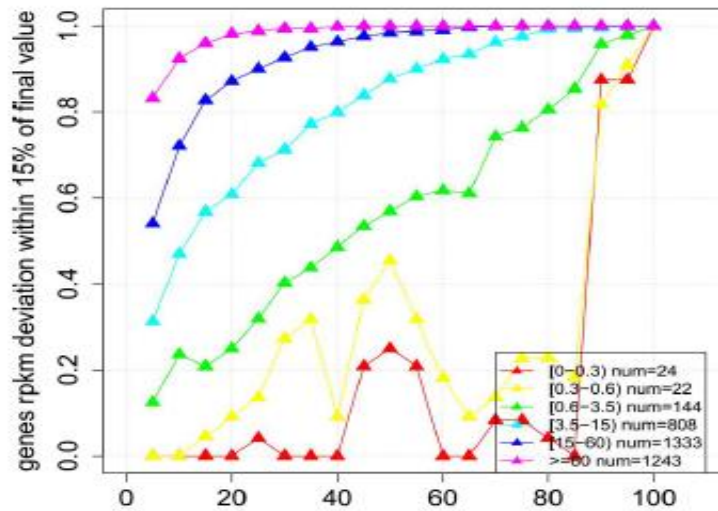

B

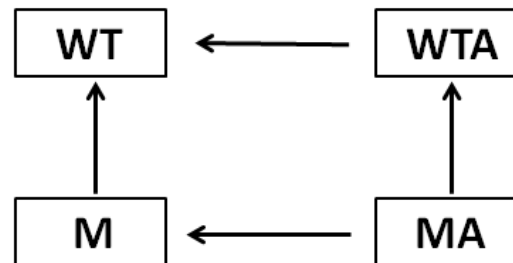

C

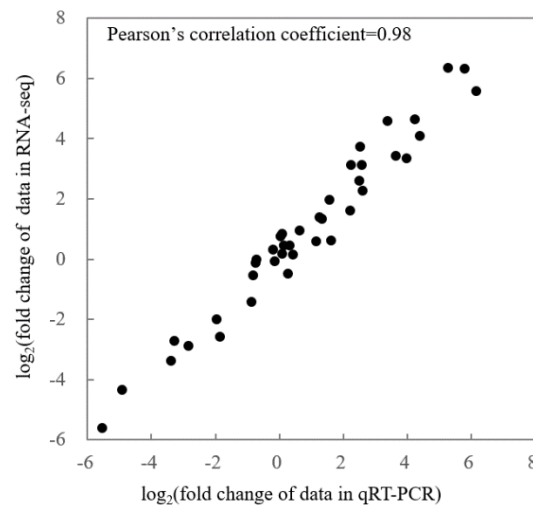

**Supplemental Figure S2. RNA sequencing data analysis and validation.** (A) Representative saturation curve of sample M1. (B) Comparison scheme of differential expressed genes between each two samples pairs indicated as arrow. WT: wild type in  $\text{Na}_2\text{SO}_4$ ; M:  $\Delta slr1821$  knockout mutant in  $\text{Na}_2\text{SO}_4$ ; WTA: wild type in  $(\text{NH}_4)_2\text{SO}_4$ ; MA:  $\Delta slr1821$  knockout mutant in  $(\text{NH}_4)_2\text{SO}_4$ . The arrow indicated comparison direction, for example, MA/M. (C) Validation of sequencing data by quantitative RT-PCR for representative genes.

A

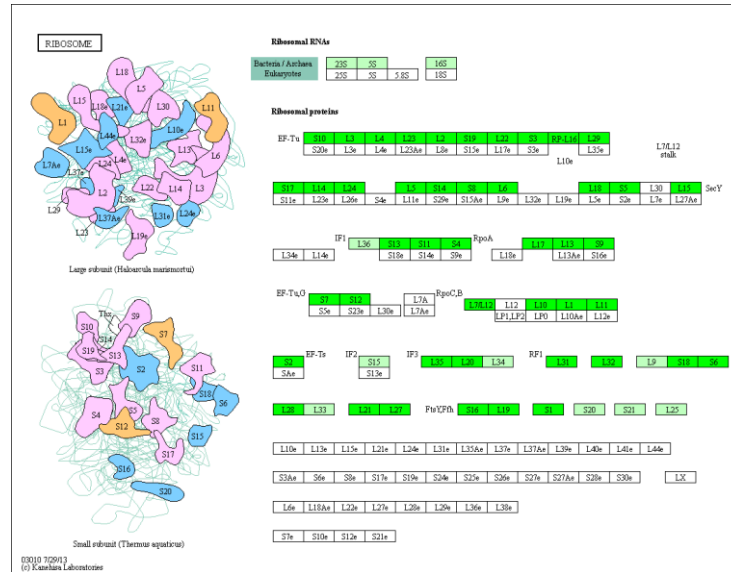

B

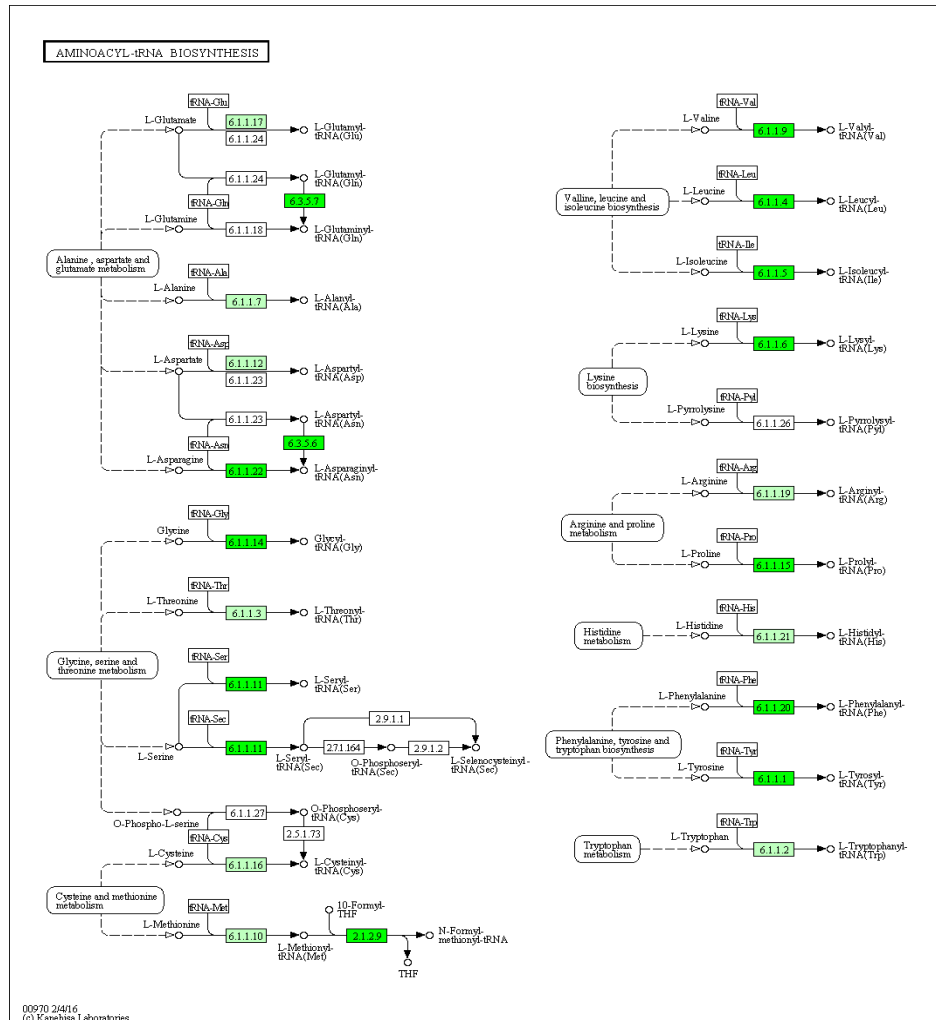

**Supplemental Figure S3. Suppressed expression of translational machinery in  $\Delta slr1821$  vs WT upon  $\text{NH}_4^+$  stress.** (A) Ribosomal proteins in ribosome large and small subunit. (B) Synthetase involved in aminoacyl-tRNA biosynthesis. Dark green highlights the suppressed gene, light green is the component without significant regulation. White ones were components not available in *Synechocystis* 6803.

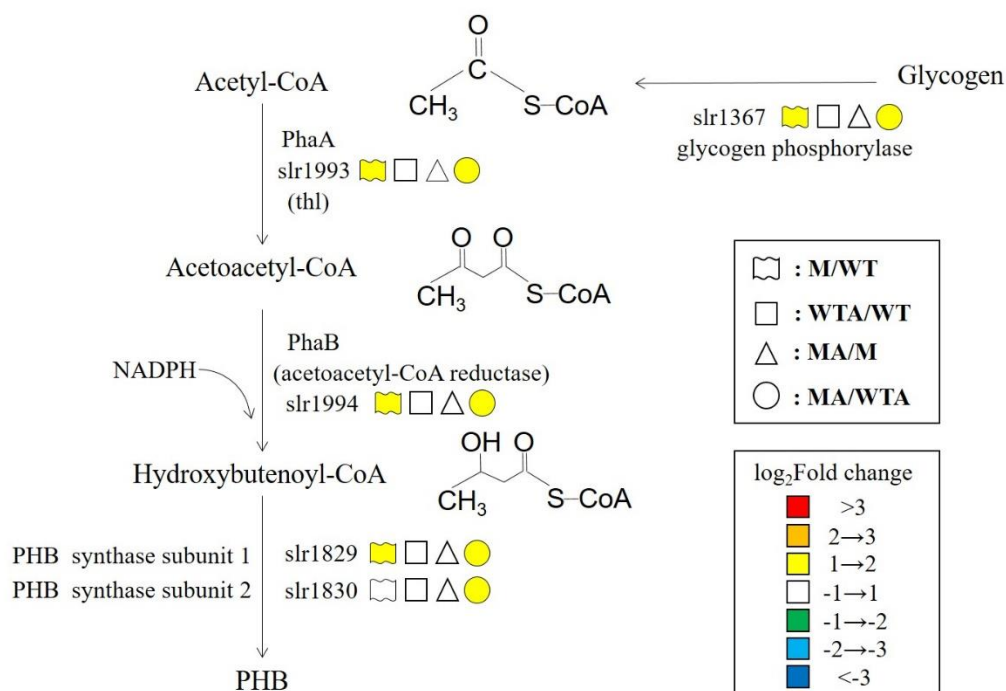

**Supplemental Figure S4. Knockout of *slr1821* resulted in higher expression of PHB synthesis genes.** The comparison pair and fold changes are indicated in different shapes and colors respectively. WT and WTA are wild type without and with  $\text{NH}_4^+$  stress. M and MA are  $\Delta\textit{slr1821}$  knockout mutant without and with  $\text{NH}_4^+$  stress.
